1 Title: Host Response to Bacterial Pathogens and Non-Pathogens is Determined by  
2 Wnt5A Mediated Actin Organization.

3 Running title: Wnt5A Regulates Host Response to Pathogens and Non-Pathogens

4 Author's Name: Suborno Jati\* and Malini Sen\*†

5 \*Division of Cancer Biology and Inflammatory Disorder, CSIR- Indian Institute of  
6 Chemical Biology, Kolkata 700032, India

7 † Corresponding author

8 E-mail address of the corresponding author: [msen@iicb.res.in](mailto:msen@iicb.res.in), [msen648@gmail.com](mailto:msen648@gmail.com)

9

10

11

12

13

14

15 Funding- This work was supported by the Department of Biotechnology, Government of  
16 India (BT/PR27125/BRB/10/1635/2017) and institutional funding. SJ was supported by  
17 Research Scholar fellowship from CSIR, Government of India and by The Company of  
18 Biologist, Journal of Cell Biology.

19

20 **Abstract:**

21 Wnt5A signaling facilitates the killing of numerous bacterial pathogens but not non-  
22 pathogens. The basis of such distinction in killing remains unclear. Accordingly, we  
23 analyzed the influence of Wnt5A signaling on pathogenic *E.coli* K1 in relation to non-  
24 pathogenic *E.coli* K12-MG1655 and *E.coli* DH5 $\alpha$ . We found that bacterial killing by  
25 macrophages is dictated by the effect of Wnt5A aided actin assembly on the incumbent  
26 bacteria. Actin assembly mediated by Wnt5A signaling antagonized the disruptive  
27 influence of internalized *E.coli* K1 on cytoskeletal actin facilitating its eradication.  
28 However, internalized *E.coli* K12-MG1655 and *E.coli* DH5 $\alpha$ , which stabilize the actin  
29 cytoskeleton remained unaffected by Wnt5A. Interestingly, actin assembly inhibitors  
30 altered bacterial phagosome compositions, supporting survival of K1, yet promoting  
31 killing of both K12-MG1655 and DH5 $\alpha$ , in Wnt5A activated macrophages. Taken  
32 together, our study reveals the importance of Wnt5A signaling dependent assembly of  
33 cytoskeletal actin in determining the outcome of host response to bacterial pathogens and  
34 non-pathogens.

35

36

37

38

39

40

41 **Introduction:**

42 Wnt5A belongs to a 19-member family of Wnt ligands, which are secreted glycoproteins.  
43 Wnts interact with Frizzled (Fz) and ROR cell surface receptors sending signals that were  
44 initially discovered as being essential for tissue morphogenesis and differentiation during  
45 growth and development (1–5). Frizzleds are seven transmembrane spanning receptors,  
46 about 12 in number, bearing homology to heterotrimeric G protein coupled receptors and  
47 RORs (ROR1 and ROR2) bear homology to tyrosine kinases. Classically, Wnt signaling  
48 is divided into two main categories – canonical ( $\beta$ -catenin dependent) and non-canonical  
49 ( $\beta$ -catenin independent) (6, 7). While canonical Wnt signaling acts through  $\beta$ -catenin  
50 mediated transactivation of specific genes such as the cyclins, non-canonical Wnt  
51 signaling acts on cell differentiation independent of  $\beta$ -catenin through activation of  
52 cytoskeletal components (8–11). On account of sequence homology among the Wnt and  
53 Frizzled/ROR family members, cross reactivity in Wnt-Frizzled/ROR interacting pairs is  
54 quite frequent. Accordingly, crosstalk is common among the signaling intermediates of  
55 the canonical and non-canonical Wnt signaling pathways (12–15).

56 Wnt5A is a prototype of the non-canonical Wnt signaling pathway. Several lines of  
57 evidence have suggested that Wnt5A interacts with Fz2, Fz4, Fz5 and ROR1/2 receptors  
58 regulating cell polarity and movements (2, 4, 5). Thus, it is quite natural to expect that  
59 Wnt5A signaling would be an important facet of macrophages, which respond to a broad  
60 spectrum of environmental cues that includes bacterial infections, through alterations in  
61 cell migration and polarity (11, 16, 17).

62 Macrophages are intrinsically wired to use lamellipodia and filopodia to counter and

63 control bacterial infections through phagocytosis, which utilizes the coordination of the  
64 actin cytoskeleton with different environmental signals (18–20). While some internalized  
65 pathogenic bacteria fall prey to macrophages getting killed, others escape the immune  
66 defense program through either self-extrusion or creation of a protective intracellular  
67 niche (21, 22). Several other bacteria, mostly non-pathogenic commensals are also able to  
68 reside in macrophages without being killed (23, 24). The idea one gets from several  
69 studies is that the fate of bacterial infections is associated with the cytoskeletal actin  
70 dynamics of macrophages (25–27). Despite considerable research in this field and  
71 extensive knowledge of the wide range of pathogenicity of several different bacteria our  
72 understanding of the molecular details of host macrophage – bacteria interactions linked  
73 with infection outcome remains incomplete.

74 The dynamic nature of the actin cytoskeleton is governed by several actin associated  
75 proteins and lipids in coordination with signaling pathways such as the Wnt signaling  
76 pathway (28–30). Several labs including ours' have demonstrated that Wnt5A signaling  
77 induces alterations in actin assembly (11, 17, 31). This finding is in perfect agreement  
78 with the depicted role of Wnt5A in bacterial phagocytosis (16). Wnt5A induced  
79 alterations in actin assembly are in fact linked with a Rac1-Dishevelled dependent host  
80 autophagy circuit that promotes both internalization and killing of pathogenic bacteria  
81 associated with respiratory disorders (17). Interestingly, however, the non-pathogenic lab  
82 strain *E.coli* DH5 $\alpha$  is internalized by Wnt5A signaling, but not killed (16). These  
83 differences in infection outcome led us to investigate how Wnt5A aided actin assembly  
84 handles different bacterial infections at the molecular level.

85 In the current report we demonstrated using pathogenic *E.coli* K1 and non-pathogenic  
86 *E.coli* K12-MG1655 and *E.coli* DH5 $\alpha$  that Wnt5A assisted actin organization is different  
87 during infection of macrophages by pathogenic and non-pathogenic strains of *E.coli*. The  
88 difference in actin organization is associated with different levels of assembled actin and  
89 actin-associated proteins. Overall, our data indicate that Wnt5A mediated actin  
90 organization varies with bacterial infections and controls infection outcome.

91

92

93

94

95

96

97

98

99

100

101

102

103

104 **Materials and Methods:**

105 Cell culture and reagents: Cells used in this study were RAW 264.7 macrophages  
106 (ATCC® TIB71™), and mouse peritoneal macrophages harvested from BALB/c mouse  
107 following published protocol (32). Bacteria, *E.coli* K1 (gift from V, Nizet, UCSD, CA),  
108 *E.coli* DH5 $\alpha$  and *E.coli* K12-MG1655 (MTCC. 1586) were used to infect RAW 264.7  
109 and peritoneal macrophages. Cells were maintained under normal tissue culture  
110 conditions in DMEM high Glucose with 10% FBS, 1% Glutamine and 1% Penicillin-  
111 Streptomycin purchased from Invitrogen, USA. Phalloidin (A34055) and DAPI (D1306)  
112 purchased from Molecular Probes, USA were used for assessing actin assembly by  
113 confocal microscopy. Recombinant Wnt5A (GF146), Rac1 inhibitor (NSC23766) and  
114 Arp-2 complex inhibitor I (CK-666) & II (CK-869) purchased from Calbiochem were  
115 used for blocking actin assembly (33).

116 Bacterial killing assay: Cells grown to about 60% confluency were infected separately  
117 with different bacteria at MOI: 10 for 1 hr (T0), after which the extracellular bacteria  
118 were discarded by extensive washing. The infected cells were incubated for different time  
119 points from 1hr-4hr (T1-T4) under normal tissue culture conditions, harvested, lysed in  
120 autoclaved distilled water and plated on agar plates for CFU (Colony Forming Units)  
121 enumeration.

122 For the inhibitor assay cells were infected with different bacteria for 1hr and post-  
123 infection different inhibitors were added to the media after PBS washes and kept for 3hr.  
124 CFU enumeration was done both at 1hr (initial CFU) and 3hr (final CFU) time points.

125 Percentage of bacteria killed was calculated by the equation: (Initial CFU – Final  
126 CFU/Initial CFU) × 100.

127 Transfection: Wnt5A siRNA transfection was done as reported previously (32). After the  
128 transfection, cells were infected with bacteria for 1hr (T0), following which, the infection  
129 was removed and cells were kept for 3hr (T3) under normal tissue culture condition. CFU  
130 was plotted controlled to cell number.

131 Filamentous (F) actin preparation and immunoblotting: F actin isolation was done  
132 following published protocol (34). Briefly, cells were harvested, resuspended in F-actin  
133 Stabilization Buffer (FSB) (50 mM PIPES, pH 6.9, 50 mM NaCl, 5 mM MgCl<sub>2</sub>, 5 mM  
134 EGTA, 5% glycerol, 0.1% Triton X-100, 0.1% NP-40, 0.1% Tween 20, 0.1% β-  
135 mercaptoethanol, 1 mM ATP) and kept at 37°C for 10 min following which the mix was  
136 centrifuged at 2000 rpm to separate the debris and unbroken cells. The supernatant was  
137 centrifuged at 150000Xg for 60 min in SW61 rotor to obtain the F actin pellet, which was  
138 resuspended in F-actin destabilizing solution (10μM CytochalasinD in sterile distilled  
139 water). F-actin level was estimated by immunoblotting with actin antibody.

140 Phagosome isolation and immunoblotting: Phagosome isolation was done according to  
141 previously published protocol (17). Briefly, infected cells were harvested, resuspended in  
142 homogenization buffer (HB) and homogenized to isolate the post-nuclear supernatant  
143 (PNS) from the total cell. PNS was subjected to discontinuous sucrose density gradient  
144 ultracentrifugation in a SW41 rotor for 1hr at 100000XG. The layer containing  
145 phagosome was collected and centrifuged again at 12000XG for 12min. The pellet  
146 obtained was resuspended in HB and subjected for western blotting and CFU calculation.

147 Confocal microscopy: Confocal microscopy was done according to previously published  
148 protocol (17). Briefly peritoneal macrophages and RAW264.7 cells were plated onto  
149 three chambered glass slides. Fixed cells (fixation was done in 4% paraformaldehyde for  
150 15min) were stained with Phalloidin (Alexa Fluor 455, 1:2000) and DAPI (1:4000) in  
151 2.5% BSA dissolved in PBST (0.1% Tween-20) for 15 min followed by 3× PBST wash.  
152 The slides were mounted and visualized under Olympus Fluoview FV10i at 60×  
153 objective and 1.3× zoom. Fluorescence intensity was measured by ImageJ.

154 Statistical analysis: Results were analyzed with unpaired Student *t* test using Graph- Pad  
155 Prism 6 software. Line diagrams and bar graphs are expressed as mean ± SEM.  $p \leq 0.05$   
156 is considered statistically significant. Significance is annotated as follows: \* $p \leq 0.05$ , \*\* $p$   
157  $\leq 0.005$ , \*\*\* $p \leq 0.0005$ .

158

159

160

161

162

163

164

165

166



167 **Results and Discussion:**

168 Wnt5A signaling has opposite effects on infections by pathogenic and non-pathogenic  
169 *E.coli*: In order to study and compare the effect of Wnt5A signaling on killing vs.  
170 survival of bacterial pathogens and non-pathogens, we focused on pathogenic *E.coli* K1  
171 in relation to *E.coli* K12-MG1655 and *E.coli* DH5 $\alpha$ , which are non-pathogenic (35–38)  
172 so as to eliminate variability due to difference in species from our study. Wnt5A  
173 signaling was activated both in the macrophage cell line RAW 264.7 and in mouse  
174 peritoneal macrophages by recombinant Wnt5A (rWnt5A) treatment prior to bacterial  
175 infection, and intracellular killing vs. survival of bacteria was estimated by comparing the  
176 CFU retrieved after one hour of infection and 2 - 4 hours post infection. Using both RAW  
177 264.7 and mouse peritoneal macrophages we observed that activation of Wnt5A signaling  
178 led to increased internalization of pathogenic *E.coli* K1 after one hour of infection (T0)  
179 followed by increased intracellular killing during 4 hours of incubation post infection (T1  
180 – T4). The non-pathogenic strains K12MG1655 and DH5 $\alpha$  on the other hand, although  
181 engulfed in increased numbers by rWnt5A were not increasingly killed (Fig 1, panels A –  
182 F). In agreement with these findings, we observed multiplication of *E.coli* K1 under  
183 Wnt5A siRNA condition with reference to the control, 3 hours after infection. The non-  
184 pathogenic strain K12MG1655 was not significantly affected by siRNA mediated Wnt5A  
185 depletion under similar conditions (Figure 1, panels G - J). The intrinsic association of  
186 cytoskeletal actin with bacterial infections (20, 39) led us to investigate if killing vs.  
187 survival of the pathogenic and non-pathogenic *E.coli* was guided by Wnt5A mediated  
188 alterations in actin assembly.

189

190 Influence of Wnt5A signaling on pathogenic and non-pathogenic *E.coli* is associated with  
191 actin assembly. In our pursuit to understand if the interrelation of pathogenic and non-  
192 pathogenic *E.coli* infections with Wnt5A signaling is dependent on actin assembly, we  
193 first studied the effect of the different bacterial infections on actin assembly and  
194 subsequently examined if activation of Wnt5A signaling in infected cells introduced  
195 alterations in the assembled actin. Estimation of assembled or F actin was performed for  
196 analyzing the extent of actin assembly under different experimental conditions. F actin  
197 was isolated through ultracentrifugation of suspensions of broken cells in F actin  
198 stabilization buffer following already published protocols (34) and quantified by  
199 immunoblotting. As an alternative measure, cells were stained with phalloidin, which  
200 binds to F actin and visualized by confocal microscopy.

201 Using both RAW 264.7 and mouse peritoneal macrophages, we observed by  
202 immunoblotting that while infection with *E.coli* K1 for 1hr led to significant reduction in  
203 the level of F actin, infection with *E.coli* K12-MG1655 and *E.coli* DH5 $\alpha$  did not have  
204 any significant effect on the F actin level. Confocal microscopy of phalloidin stained  
205 peritoneal macrophages after bacterial infection corroborated the observed reduction in F  
206 actin mediated by *E.coli* K1, and revealed slight elevation of assembled actin in cells  
207 infected with the non-pathogenic strains (Fig 2, panels A and B). Activation of Wnt5A  
208 signaling through added rWnt5A (using PBS as vehicle control) led to significant  
209 increase in actin assembly in the K1 infected RAW 264.7 cells with only slight increase  
210 in the K12-MG1655 and DH5 $\alpha$  infected cells, 3 hrs post infection (T3). This was  
211 demonstrated by estimation of F actin by both immunoblotting and confocal microscopy  
212 (Fig 2, panels C - E). While the significant increase in Wnt5A induced actin alteration

213 was associated with bacterial killing in the case of *E.coli* K1, the incremental increase in  
214 actin assembly was not conducive to killing in the case of the non-pathogenic strains of  
215 *E.coli*, K12-MG1655 and DH5 $\alpha$ .

216 That Wnt5A signaling inherently alters actin assembly was validated by the effect of  
217 Wnt5A depletion on the F actin level of macrophages, both by immunoblotting and  
218 confocal microscopy (Fig 2, panels F - J). Panels I and J demonstrate the siRNA -  
219 mediated reduction in Wnt5A level. Accordingly, the detrimental effect of *E.coli* K1 on  
220 assembled actin was antagonized by Wnt5A signaling. Since the non-pathogenic strains  
221 of *E.coli* K12-MG1655 and DH5 $\alpha$  are not detrimental to assembled actin there was no  
222 major influence of Wnt5A signaling on actin assembly and bacterial killing in the cells  
223 infected with these strains. This phenomenon was corroborated by the observed reduction  
224 in the cell associated Wnt5A level by K1, but not K12-MG1655 (Supplementary Fig 1).

225

226 Wnt5A assisted killing of *E.coli* K1 but not *E.coli* K12-MG1655 correlates with  
227 alteration in the bacterial phagosome composition of infected macrophages. Actin  
228 dynamics following internalization of bacteria leads to the formation of phagosomes (40,  
229 41). Since phagosomes determine the fate of internalized bacteria, we examined if the  
230 difference in Wnt5A assisted actin assembly in pathogen (*E.coli* K1) and non-pathogen  
231 (*E.coli* K12-MG1655) infected macrophages correlated with difference in the respective  
232 phagosome compositions.

233 Phagosomes were harvested separately from *E.coli* K1 and *E.coli* K12-MG1655 infected  
234 RAW 264.7 macrophages 3 hours post infection by ultracentrifugation of the

235 corresponding cell lysates in sucrose density gradient, following published protocol (17).  
236 Prior to infection and phagosome preparation, macrophages were pretreated with either  
237 Wnt5A conditioned medium prepared from Wnt5A overexpressing L cells (L5A) for  
238 activation of Wnt5A signaling or with just L cell conditioned medium (L) as control (32).  
239 Indeed, in case of infection with *E.coli* K1, significantly more actin accumulated in the  
240 phagosomes corresponding to L5A treatment as compared to those corresponding to L  
241 treatment, implying that Wnt5A assisted actin assembly in the infected cells is reflected  
242 at the phagosome level. L5A induced increase in phagosomal actin as compared to L in  
243 the *E.coli* K1 infected cells was accompanied by notable increase in accumulation of  
244 phosphorylated Arp2 (p-Arp2: phosphorylated at Thr 237/238) and Rac1, which are  
245 known regulators of actin organization (42–44). This correlated with augmented  
246 phagosomal maturation as depicted by increase in Rab7, a marker of phagolysosomes  
247 (Fig 3, panel A). The increased level of Rac1, which is required for NADPH oxidase  
248 assembly (45), in the L5A phagosomes, furthermore implied possible increase in  
249 NADPH oxidase activity. These findings were in agreement with increased killing, as  
250 denoted by the lesser number of *E.coli* K1 in the phagosomes of L5A treated  
251 macrophages as compared to those treated with L (Fig 3, panel B). The levels of Arp2  
252 (unphosphorylated) remained more or less the same in the L5A and L sets of K1  
253 phagosomes (Fig 3, panel A). In case of infection with *E.coli* K12-MG1655, there was no  
254 notable difference in phagosomal actin, Rac1 or p-Arp2 between the L5A and L sets,  
255 which was in accordance with only slight but not significant alteration of actin assembly  
256 through activation of Wnt5A signaling (Fig 2 panel C). Consequently, in this case there  
257 was also no notable difference in phagosomal maturation and activity as evident from the

258 almost similar number of retrieved bacteria from the phagosomes of the L5A and L sets  
259 (Fig 3, panels A and B). Total phagosomal Arp-2 level also did not increase with L5A  
260 treatment (Fig 3, panel A). Panel C denotes presence of Wnt5A in L5A conditioned  
261 medium but not in L.

262

263 Inhibitors of Rac1 and Arp2 have opposite effects on the killing of *E.coli* K1 and *E.coli*  
264 K12MG1655/*E.coli* DH5 $\alpha$ , substantiating the role of Wnt5A induced actin assembly on  
265 infection outcome. The results of experiments explained so far clearly indicated that  
266 Wnt5A aided actin assembly is intrinsically associated with the outcome of infections of  
267 macrophages with pathogenic *E.coli* K1 and the non-pathogenic *E.coli* K12-MG1655 and  
268 *E.coli* DH5 $\alpha$ . In order to validate this concept we examined if the outcome of infections  
269 by these different bacteria can be changed by altering the extent of Wnt5A aided actin  
270 assembly through the application of actin nucleation/branching and assembly inhibitors.  
271 These inhibitors were targeted toward Rac1 and Arp2, which are known to be essential  
272 for actin nucleation/branching and organization (43, 45, 46).

273 Wnt5A or PBS (vehicle control) pretreated RAW 264.7 and peritoneal macrophages were  
274 infected with either *E.coli* K1 or the non-pathogenic strains for 1 hour. Subsequently,  
275 each infected set of cells was washed free of extracellular bacteria and incubated  
276 separately for 3 hours with inhibitors to Rac1 (15 $\mu$ M) and Arp2 (20 $\mu$ M) using PBS or  
277 DMSO as vehicle control (33). Bacterial CFU retrieved from the infected cells were  
278 estimated to evaluate the effect of inhibition of Wnt5A assisted actin assembly on the  
279 infection outcome. Confocal microscopy of phalloidin stained infected cells was

280 performed to assess the inhibitor-mediated changes in actin assembly. Additionally,  
281 phagosomes were prepared 3 hours post infection from *E.coli* K1 and *E.coli* K12-  
282 MG1655 infected cells pretreated with either L5A or L conditioned media to estimate the  
283 levels of phagosomal actin and actin assembly proteins (p-Arp2 and Rac1) by  
284 immunoblotting.

285 Interestingly, Rac1 and Arp2 inhibitors blocked Wnt5A mediated killing of the  
286 pathogenic strain *E.coli* K1, but promoted killing of the non-pathogenic strains *E.coli*  
287 K12-MG1655 and *E.coli* DH5 $\alpha$  (Fig 4, panels A – F, Supplementary Fig 2). Clearly, the  
288 opposite effects of the inhibitors on K1 and K12-MG1655 infected macrophages were  
289 associated with notable differences both in the pattern of actin assembly as depicted by  
290 phalloidin staining (Fig4, panels G), and in the levels of phagosomal actin and actin  
291 assembly proteins (p-Arp-2 and Rac1) as depicted by immunoblotting of phagosome  
292 preparations (panel H).

293 Confocal microscopy of phalloidin stained macrophages revealed that application of  
294 inhibitors to Wnt5A pretreated K1 infected macrophages led to decrease in actin  
295 assembly to a level that was significantly less than that of the Wnt5A-K1 set and almost  
296 similar to that of the control (PBS-K1 set). On the other hand, similar inhibitor  
297 application to Wnt5A pretreated K12-MG1655 infected macrophages resulted in a level  
298 of assembled actin that was less than the levels corresponding to the Wnt5A-K12-  
299 MG1655 and PBS-K12-MG-1655 sets, but considerably more than the level of the  
300 inhibitor-K1 set.

301 Similar to our observation in confocal microscopy, in the case of *E.coli* K1 phagosome,  
302 the levels of actin, p-Arp2 and Rac1 of the inhibitor set was much less than that of the  
303 L5A (Wnt5A) set and almost at par with that of the L (control) set. In the case of *E.coli*  
304 K12-MG1655 phagosome, on the other hand, the levels of the phagosomal actin and actin  
305 assembly proteins p-Arp2 and Rac1 of the inhibitor-K12-MG1655 set were slightly less  
306 than those of the L5A and L sets but considerably more than the corresponding level of  
307 the inhibitor-K1 set, when compared relative to the corresponding levels of total  
308 phagosomal Arp2.

309 The markedly reduced levels of Rac1 and Rab7 in the *E.coli* K1 phagosomes of the  
310 inhibitor set as compared to those of the L5A set pointed toward decline in NADPH  
311 oxidase activity and blockade in phagolysosomal maturation (47, 48) as the likely causes  
312 of decreased killing. Unlike K1 infection, which antagonized the effect of Wnt5A  
313 signaling, K12-MG1655 infection promoted the effect of Wnt5A signaling on actin  
314 assembly as observed in Fig 2. Accordingly, the residual assembled actin and actin  
315 assembly proteins following administration of the actin assembly inhibitors was always  
316 notably more in K12-MG1655 phagosomes as compared to K1 phagosomes. This aspect  
317 was also reflected in confocal microscopy of phalloidin stained cells. Since actin  
318 assembly inhibitor assisted killing of K12-MG1655 correlated with alteration in the level  
319 of phagosomal Rac1 but not Rab7 (comparing L5A with L5A + CK666), it is possible  
320 that K12-MG1655 killing correlates with regulation of NADPH oxidase activity.

321 Although more molecular details are needed to unravel the different modes of actin  
322 assembly during bacterial infections, these results clearly indicate that an optimal level of  
323 assembled phagosomal actin and actin assembly proteins is required for bacterial killing.

324 In case of K1 infection this optimal level is obtained through activation of Wnt5A  
325 signaling, but in case of K12-MG1655 infection, additional tuning by actin assembly  
326 inhibitor is required.

327 Simply stated, it is the level and type of actin organization that determines whether or not  
328 bacteria internalized by macrophages will be killed, and Wnt5A signaling in  
329 macrophages is a significant determinant of that organization. While non-pathogens are  
330 tuned to Wnt5A mediated actin organization, pathogens antagonize it and get killed, as  
331 explained by a simplified model in Supplementary Figure 3. Thus it would be fair to  
332 state that bacterial infection in macrophages can be managed through changes in actin  
333 assembly by controlling the level of Wnt5A signaling. Accordingly, Wnt5A signaling  
334 may be envisaged as a significant factor required for regulating immune resistance to  
335 infection. This concept is corroborated by the inhibitory effect of Wnt5A signaling on  
336 infection by pathogenic bacteria such as *Streptococcus pneumoniae*, *Pseudomonas*  
337 *aeruginosa*, and *Mycobacterium tuberculosis* (17, 49).

338 In connection with this study it is to be noted that Wnt5A signaling assists in the survival  
339 of the pathogen *E. chaffensis* (50). Hence it is important to look into the interrelation  
340 between Wnt5A assisted actin assembly and *E. chaffensis* infection. At the same time,  
341 given the observed effect of Wnt5A signaling on non-pathogens, it is also important to  
342 understand if the commensal bacteria, which have coevolved with the host and are crucial  
343 for immune defense benefit from Wnt5A signaling mediated actin assembly (51–53).

344

345



346 **Acknowledgement**

347 We acknowledge A. Konar, IICB for animal experiments, B. Das, IICB for confocal  
348 microscopy and CSIR-IICB Central Instrumentation Facility (CIF), for central  
349 instrumental support. We acknowledge Soham Sengupta for expert technical assistance in  
350 experiments.

351

352

353

354

355

356

357

358

359

360

361

362

363

## 364 **References**

- 365 1. Nusse, R., and R. Nusse. 2005. Wnt signaling in disease and in development. *Cell*  
366 *research* 15: 28–32.
- 367 2. He, X., J.-P. Saint-Jeannet, Y. Wang, J. Nathans, I. Dawid, and H. Varmus. 1997. A  
368 Member of the Frizzled Protein Family Mediating Axis Induction by Wnt-5A. *Science*  
369 275: 1652–1654.
- 370 3. Cadigan, K. M., and R. Nusse. 1997. Wnt signaling: a common theme in animal  
371 development. *Genes Dev.* 11: 3286–3305.
- 372 4. Sato, A., H. Yamamoto, H. Sakane, H. Koyama, and A. Kikuchi. 2010. Wnt5a  
373 regulates distinct signalling pathways by binding to Frizzled2. *The EMBO journal* 29:  
374 41–54.
- 375 5. Yu, J., L. Chen, B. Cui, G. F. Widhopf, Z. Shen, R. Wu, L. Zhang, S. Zhang, S. P. Briggs,  
376 and T. J. Kipps. 2015. Wnt5a induces ROR1/ROR2 heterooligomerization to enhance  
377 leukemia chemotaxis and proliferation. *Journal of Clinical Investigation* 126: 585–  
378 598.
- 379 6. Komiya, Y., and R. Habas. 2008. Wnt signal transduction pathways. *Organogenesis*  
380 4: 68–75.
- 381 7. Sen, M., and G. Ghosh. 2008. Transcriptional outcome of Wnt-Frizzled signal  
382 transduction in inflammation: evolving concepts. *J. Immunol.* 181: 4441–4445.
- 383 8. Clevers, H. 2006. Wnt/ $\beta$ -Catenin Signaling in Development and Disease. *Cell* 127:  
384 469–480.
- 385 9. Kühl, M., L. C. Sheldahl, M. Park, J. R. Miller, and R. T. Moon. 2000. The Wnt/Ca<sup>2+</sup>  
386 pathway: a new vertebrate Wnt signaling pathway takes shape. *Trends Genet.* 16:  
387 279–283.
- 388 10. Chavali, M., M. Klingener, A. G. Kokkosis, Y. Garkun, S. Felong, A. Maffei, and A.  
389 Aguirre. 2018. Non-canonical Wnt signaling regulates neural stem cell quiescence  
390 during homeostasis and after demyelination. *Nature Communications* 9: 1–17.
- 391 11. Witze, E. S., E. S. Litman, G. M. Argast, R. T. Moon, and N. G. Ahn. 2008. Wnt5a  
392 control of cell polarity and directional movement by polarized redistribution of  
393 adhesion receptors. *Science* 320: 365–369.
- 394 12. Dijksterhuis, J. P., J. Petersen, and G. Schulte. 2014. International Union of Basic  
395 and Clinical Pharmacology Review: WNT/Frizzled signalling: receptor–ligand  
396 selectivity with focus on FZD-G protein signalling and its physiological relevance:  
397 IUPHAR Review 3. *Br J Pharmacol* 171: 1195–1209.
- 398 13. Qi, J., H.-J. Lee, A. Saquet, X.-N. Cheng, M. Shao, J. J. Zheng, and D.-L. Shi. 2017.  
399 Autoinhibition of Dishevelled protein regulated by its extreme C terminus plays a  
400 distinct role in Wnt/ $\beta$ -catenin and Wnt/planar cell polarity (PCP) signaling  
401 pathways. *J. Biol. Chem.* 292: 5898–5908.
- 402 14. Aznar, N., K. K. Midde, Y. Dunkel, I. Lopez-Sanchez, Y. Pavlova, A. Marivin, J.  
403 Barbazán, F. Murray, U. Nitsche, K.-P. Janssen, K. Willert, A. Goel, M. Abal, M. Garcia-  
404 Marcos, and P. Ghosh. 2015. Daple is a novel non-receptor GEF required for trimeric  
405 G protein activation in Wnt signaling. *Elife* 4: e07091.
- 406 15. Mikels, A. J., and R. Nusse. 2006. Purified Wnt5a Protein Activates or Inhibits  $\beta$ -  
407 Catenin–TCF Signaling Depending on Receptor Context. *PLoS Biology* 4: e115.

- 408 16. Maiti, G., D. Naskar, and M. Sen. 2012. The Wingless homolog Wnt5a stimulates  
409 phagocytosis but not bacterial killing. *Proceedings of the National Academy of*  
410 *Sciences* 109: 16600–16605.
- 411 17. Jati, S., S. Kundu, A. Chakraborty, S. K. Mahata, V. Nizet, and M. Sen. 2018. Wnt5A  
412 Signaling Promotes Defense Against Bacterial Pathogens by Activating a Host  
413 Autophagy Circuit. *Front Immunol* 9: 679.
- 414 18. Rougerie, P., V. Miskolci, and D. Cox. 2013. Generation of membrane structures  
415 during phagocytosis and chemotaxis of macrophages: role and regulation of the  
416 actin cytoskeleton. *Immunol Rev* 256.
- 417 19. Möller, J., T. Lühmann, M. Chabria, H. Hall, and V. Vogel. 2013. Macrophages lift  
418 off surface-bound bacteria using a filopodium-lamellipodium hook-and-shovel  
419 mechanism. *Sci Rep* 3.
- 420 20. Anes, E. 2017. Acting on Actin During Bacterial Infection. *Cytoskeleton -*  
421 *Structure, Dynamics, Function and Disease* .
- 422 21. Thi, E. P., U. Lambertz, and N. E. Reiner. 2012. Sleeping with the Enemy: How  
423 Intracellular Pathogens Cope with a Macrophage Lifestyle. *PLOS Pathogens* 8:  
424 e1002551.
- 425 22. Intracellular Killing - an overview | ScienceDirect Topics. .
- 426 23. Morikawa, M., S. Tsujibe, J. Kiyoshima-Shibata, Y. Watanabe, N. Kato-Nagaoka, K.  
427 Shida, and S. Matsumoto. 2016. Microbiota of the Small Intestine Is Selectively  
428 Engulfed by Phagocytes of the Lamina Propria and Peyer's Patches. *PLoS ONE* 11:  
429 e0163607.
- 430 24. Rios, D., M. B. Wood, J. Li, B. Chassaing, A. T. Gewirtz, and I. R. Williams. 2016.  
431 Antigen sampling by intestinal M cells is the principal pathway initiating mucosal  
432 IgA production to commensal enteric bacteria. *Mucosal Immunology* 9: 907–916.
- 433 25. Jati, S., T. R. Sarraf, D. Naskar, and M. Sen. 2019. Wnt Signaling: Pathogen  
434 Incursion and Immune Defense. *Front Immunol* 10.
- 435 26. Mostowy, S., and A. R. Shenoy. 2015. The cytoskeleton in cell-autonomous  
436 immunity: structural determinants of host defence. *Nature Reviews Immunology* 15:  
437 559–573.
- 438 27. Kolonko, M., A. C. Geffken, T. Blumer, K. Hagens, U. E. Schaible, and M. Hagedorn.  
439 2014. WASH-driven actin polymerization is required for efficient mycobacterial  
440 phagosome maturation arrest. *Cell. Microbiol.* 16: 232–246.
- 441 28. Lodish, H., A. Berk, S. L. Zipursky, P. Matsudaira, D. Baltimore, and J. Darnell.  
442 2000. The Actin Cytoskeleton. *Molecular Cell Biology. 4th edition* .
- 443 29. Anes, E., M. P. Kühnel, E. Bos, J. Moniz-Pereira, A. Habermann, and G. Griffiths.  
444 2003. Selected lipids activate phagosome actin assembly and maturation resulting in  
445 killing of pathogenic mycobacteria. *Nat. Cell Biol.* 5: 793–802.
- 446 30. Chesarone, M. A., and B. L. Goode. 2009. Actin Nucleation and Elongation Factors:  
447 Mechanisms and Interplay. *Curr Opin Cell Biol* 21: 28–37.
- 448 31. Chakraborty, A., S. P. Kurati, S. K. Mahata, S. Sundar, S. Roy, and M. Sen. 2017.  
449 Wnt5a Signaling Promotes Host Defense against *Leishmania donovani* Infection. *J.*  
450 *Immunol.* 199: 992–1002.
- 451 32. Naskar, D., G. Maiti, A. Chakraborty, A. Roy, D. Chattopadhyay, and M. Sen. 2014.  
452 Wnt5a-Rac1-NF- B Homeostatic Circuitry Sustains Innate Immune Functions in  
453 Macrophages. *The Journal of Immunology* 192: 4386–4397.

- 454 33. Nolen, B. J., N. Tomasevic, A. Russell, D. W. Pierce, Z. Jia, C. D. McCormick, J.  
455 Hartman, R. Sakowicz, and T. D. Pollard. 2009. Characterization of two classes of  
456 small molecule inhibitors of Arp2/3 complex. *Nature* 460: 1031–1034.
- 457 34. Mueller, P., A. Quintana, D. Griesemer, M. Hoth, and J. Pieters. 2007. Disruption of  
458 the cortical actin cytoskeleton does not affect store operated Ca<sup>2+</sup> channels in  
459 human T-cells. *FEBS Letters* 581: 3557–3562.
- 460 35. Sukumaran, S. K., S. K. Selvaraj, and N. V. Prasadarao. 2004. Inhibition of  
461 apoptosis by *Escherichia coli* K1 is accompanied by increased expression of BclXL  
462 and blockade of mitochondrial cytochrome c release in macrophages. *Infect. Immun.*  
463 72: 6012–6022.
- 464 36. Blattner, F. R., G. Plunkett, C. A. Bloch, N. T. Perna, V. Burland, M. Riley, J. Collado-  
465 Vides, J. D. Glasner, C. K. Rode, G. F. Mayhew, J. Gregor, N. W. Davis, H. A. Kirkpatrick,  
466 M. A. Goeden, D. J. Rose, B. Mau, and Y. Shao. 1997. The complete genome sequence  
467 of *Escherichia coli* K-12. *Science* 277: 1453–1462.
- 468 37. Moriel, D. G., I. Bertoldi, A. Spagnuolo, S. Marchi, R. Rosini, B. Nesta, I. Pastorello,  
469 V. A. M. Corea, G. Torricelli, E. Cartocci, S. Savino, M. Scarselli, U. Dobrindt, J. Hacker,  
470 H. Tettelin, L. J. Tallon, S. Sullivan, L. H. Wieler, C. Ewers, D. Pickard, G. Dougan, M. R.  
471 Fontana, R. Rappuoli, M. Pizza, and L. Serino. 2010. Identification of protective and  
472 broadly conserved vaccine antigens from the genome of extraintestinal pathogenic  
473 *Escherichia coli*. *PNAS* 107: 9072–9077.
- 474 38. Alkeskas, A., P. Ogrodzki, M. Saad, N. Masood, N. R. Rhoma, K. Moore, A. Farbos,  
475 K. Paszkiewicz, and S. Forsythe. 2015. The molecular characterisation of *Escherichia*  
476 *coli* K1 isolated from neonatal nasogastric feeding tubes. *BMC Infect. Dis.* 15: 449.
- 477 39. Bugalhão, J. N., L. J. Mota, and I. S. Franco. 2015. Bacterial nucleators: actin' on  
478 actin. *Pathog Dis* 73.
- 479 40. Marion, S., E. Hoffmann, D. Holzer, C. L. Clainche, M. Martin, M. Sachse, I. Ganeva,  
480 P. Mangeat, and G. Griffiths. 2011. Ezrin Promotes Actin Assembly at the Phagosome  
481 Membrane and Regulates Phago-Lysosomal Fusion. *Traffic* 12: 421–437.
- 482 41. Marie-Anaïs, F., J. Mazzolini, F. Herit, and F. Niedergang. 2016. Dynamin-Actin  
483 Cross Talk Contributes to Phagosome Formation and Closure. *Traffic* 17: 487–499.
- 484 42. Narayanan, A., L. L. L. Iii, D. L. Barber, and M. P. Jacobson. 2011. Phosphorylation  
485 of the Arp2 Subunit Relieves Auto-inhibitory Interactions for Arp2/3 Complex  
486 Activation. *PLOS Computational Biology* 7: e1002226.
- 487 43. LeClaire, L. L., M. Baumgartner, J. H. Iwasa, R. D. Mullins, and D. L. Barber. 2008.  
488 Phosphorylation of the Arp2/3 complex is necessary to nucleate actin filaments. *J*  
489 *Cell Biol* 182: 647–654.
- 490 44. Sun, C. X., M. A. O. Magalhães, and M. Glogauer. 2007. Rac1 and Rac2  
491 differentially regulate actin free barbed end formation downstream of the fMLP  
492 receptor. *J Cell Biol* 179: 239–245.
- 493 45. Ueyama, T., M. Geiszt, and T. L. Leto. 2006. Involvement of Rac1 in Activation of  
494 Multicomponent Nox1- and Nox3-Based NADPH Oxidases. *Mol Cell Biol* 26: 2160–  
495 2174.
- 496 46. Pizarro-Cerdá, J., D. S. Chorev, B. Geiger, and P. Cossart. 2017. The Diverse Family  
497 of Arp2/3 Complexes. *Trends Cell Biol.* 27: 93–100.

- 498 47. Dingjan, I., P. T. A. Linders, L. van den Bekerom, M. V. Baranov, P. Halder, M. ter  
499 Beest, and G. van den Bogaart. 2017. Oxidized phagosomal NOX2 complex is  
500 replenished from lysosomes. *J Cell Sci* 130: 1285–1298.
- 501 48. Harrison, R. E., C. Bucci, O. V. Vieira, T. A. Schroer, and S. Grinstein. 2003.  
502 Phagosomes Fuse with Late Endosomes and/or Lysosomes by Extension of  
503 Membrane Protrusions along Microtubules: Role of Rab7 and RILP. *Molecular and*  
504 *Cellular Biology* 23: 6494–6506.
- 505 49. Gao, Y., Q. Wen, S. Hu, X. Zhou, W. Xiong, X. Du, L. Zhang, Y. Fu, J. Yang, C. Zhou, Z.  
506 Zhang, Y. Li, H. Liu, Y. Huang, and L. Ma. 2019. IL-36 $\gamma$  Promotes Killing of  
507 Mycobacterium tuberculosis by Macrophages via WNT5A-Induced Noncanonical  
508 WNT Signaling. *J. Immunol.* 203: 922–935.
- 509 50. Luo, T., P. S. Dunphy, T. T. Lina, and J. W. McBride. 2016. Ehrlichia chaffeensis  
510 Exploits Canonical and Noncanonical Host Wnt Signaling Pathways To Stimulate  
511 Phagocytosis and Promote Intracellular Survival. *Infect. Immun.* 84: 686–700.
- 512 51. Molina, M. A., A. M. Díaz, C. Hesse, W. Ginter, M. V. Gentilini, G. G. Nuñez, A. M.  
513 Canellada, T. Sparwasser, L. Berod, M. S. Castro, and M. A. Manghi. 2015.  
514 Immunostimulatory Effects Triggered by Enterococcus faecalis CECT7121 Probiotic  
515 Strain Involve Activation of Dendritic Cells and Interferon-Gamma Production. *PLoS*  
516 *ONE* 10: e0127262.
- 517 52. Macpherson, A. J., and T. Uhr. 2004. Induction of protective IgA by intestinal  
518 dendritic cells carrying commensal bacteria. *Science* 303: 1662–1665.
- 519 53. Ost, K. S., and J. L. Round. 2017. A Few Good Commensals: Gut Microbes Use IFN-  
520  $\gamma$  to Fight Salmonella. *Immunity* 46: 977–979.
- 521

522

523

524

525

526

527

528

529

530 **Figure legends**

531 **Figure 1. Wnt5A signaling facilitates killing of pathogenic but not non-pathogenic**  
532 **bacteria.** rWnt5A aided in intracellular killing of pathogenic bacterial strain *E.coli* K1 in  
533 both RAW264.7 (A) and peritoneal macrophages (D) as estimated by Colony Forming  
534 Units (CFU) (n=3) harvested from infected cells at different time points (T1-T4), 1hr  
535 after infection (T0). rWnt5A did not promote killing of non-pathogenic bacterial strains  
536 *E.coli* K12-MG1655 (B, E) (n=3) and *E.coli* DH5 $\alpha$  (C, F) (n=3) as observed in both  
537 RAW264.7 and peritoneal macrophages (PM $\phi$ ). Decrease in endogenous Wnt5A  
538 expression promoted the intracellular proliferation of pathogenic *E.coli* K1 (G) (n=3) but  
539 not non-pathogenic *E.coli* K12-MG1655 (H) (n=3) as depicted from the harvested CFU  
540 at T0 and T3. Wnt5A siRNA resulted in decreased phagocytosis of both *E.coli* K1 and  
541 *E.coli* K12-MG1655 (G,H). Effect of Wnt5A siRNA transfection was confirmed by RT-  
542 PCR (I) and immunoblot analysis (J) in RAW264.7 cells. Data represented as mean  $\pm$   
543 SEM; \* $p \leq 0.05$ , \*\* $p \leq 0.005$ , \*\*\* $p \leq 0.0005$ , NS; Not Significant.

544 **Figure 2. Wnt5A signaling alters the cytoskeletal actin modulation induced by**  
545 **pathogenic bacterial infection.** Infection of PM $\phi$  and RAW264.7 by pathogenic *E.coli*  
546 K1, but not non-pathogenic *E.coli* K12-MG1655 or *E.coli* DH5 $\alpha$ , at MOI-10  
547 (Multiplicity of Infection) for 1hr resulted in decrease of total cellular F-actin as  
548 depicted by immunoblotting of isolated F-actin (A) and confocal microscopy of  
549 phalloidin stained cells (B). Wnt5A signaling opposed effect of K1 infection (3 hr  
550 incubation after 1 hr infection:T3), enhancing F-actin formation as observed by  
551 immunoblotting and confocal microscopy of phalloidin stained cells (C, D). Wnt5A  
552 signaling produced little or no change in F actin upon *E.coli* K12-MG1655 and *E.coli*

553 DH5 $\alpha$  infection following similar procedure (C, D). Intensity of phalloidin staining was  
554 measured by ImageJ (E) (n=3). Decrease in endogenous Wnt5A level resulted in decrease  
555 of total cellular F-actin in RAW 264.7 as demonstrated by immunoblotting (F) and  
556 confocal microscopy followed by ImageJ analysis (G, H). Efficiency of Wnt5A siRNA  
557 transfection was assessed through RT-PCR (I) and immunoblotting (J). Data represented  
558 as mean  $\pm$  SEM; \* $p \leq 0.05$ , \*\* $p \leq 0.005$ .

559 **Figure 3.** Wnt5A signaling induced altered phagosomal components results in killing of  
560 pathogenic bacteria and survival of non-pathogenic bacteria. During *E.coli* K1 infection,  
561 phagosome isolated from L5A treated cells 3hr post infection (L5A Phg.) exhibited  
562 higher levels of phosphorylated Arp2 (pArp2), Actin, Rac1, Rab7 than phagosome  
563 isolated from L treated cells 3hr post infection (L Phg.) as demonstrated by  
564 immunoblotting (A) (n=3). Level of total Arp2 was more or less same in both L5A phg.  
565 and L phg. (A). During *E.coli* K12-MG1655 infection there was no such difference in the  
566 level of pArp2, Actin, Rac1, Rab7 between L5A phg. and L phg. as depicted by  
567 immunoblotting (A) (n=3). Level of total Arp2 was similar in both L5A phg. and L phg.  
568 (A). Panel (B) shows the difference in bacterial load of *E.coli* K1 and *E.coli* K12-  
569 MG1655 in the L5A phg. and L phg. sets. Panel (C) shows the presence of Wnt5A in  
570 L5A conditioned media (L-cells stably expressing Wnt5A) but not in L conditioned  
571 media as depicted by immunoblotting.

572 **Figure 4.** Arp2 and Rac1 inhibitors modify the Wnt5A induced fate of pathogenic and  
573 non-pathogenic bacteria through alteration in actin assembly. Class I (CK-666; 20 $\mu$ M)  
574 (n=3), ClassII (CK-869; 20 $\mu$ M) (n=3) Arp2 inhibitors and Rac1 inhibitor (Rac1; 15 $\mu$ M)  
575 (n=3) treatment post infection promoted killing of *E.coli* K12MG1655 (*E.coli* K12MG)

576 in Wnt5A activated cells but impaired the killing of *E.coli* K1 under similar situation in  
577 both RAW 264.7 and peritoneal macrophages as presented in panel (A-F). Class I Arp2  
578 inhibitor (CK-666; 20 $\mu$ M) treatment altered the Wnt5A induced actin modulation both in  
579 case of *E.coli* K12MG1655 and *E.coli* K1 as detected by phalloidin staining in peritoneal  
580 macrophages. But the actin organization and staining of Wnt5A+CK-666 + *E.coli*  
581 K12MG set was more than that of the Wnt5A+CK-666 + *E.coli* K1 set (G, H). Similarly,  
582 at the phagosome level, L5A and Class I Arp2 inhibitor (CK-666; 20 $\mu$ M) treated sets  
583 (L5A+CK-666 Phg.) showed decrease in the level of pArp2, Rac1 and Actin as compared  
584 to the L5A+DMSO and L+DMSO treated sets in both *E.coli* K12MG and *E.coli* K1  
585 infection as depicted by immunoblotting. But, the level of pArp2, Rac1 and actin was  
586 more in case of L5A + CK-666 + K12 than in case of L5A + CK-666 + K1. Rab7 was  
587 less in case of K1 infection but not in case of K1 MG1655 infection after CK-666  
588 treatment Level of total Arp2 in the respective experimental sets served as loading  
589 control (H). DMSO acted as vehicle control. Data represented as mean  $\pm$  SEM; \* $p \leq 0.05$ ,  
590 \*\* $p \leq 0.005$ , \*\*\* $p \leq 0.0005$ , NS; Not Significant.



**Figure 1**

RAW264.7

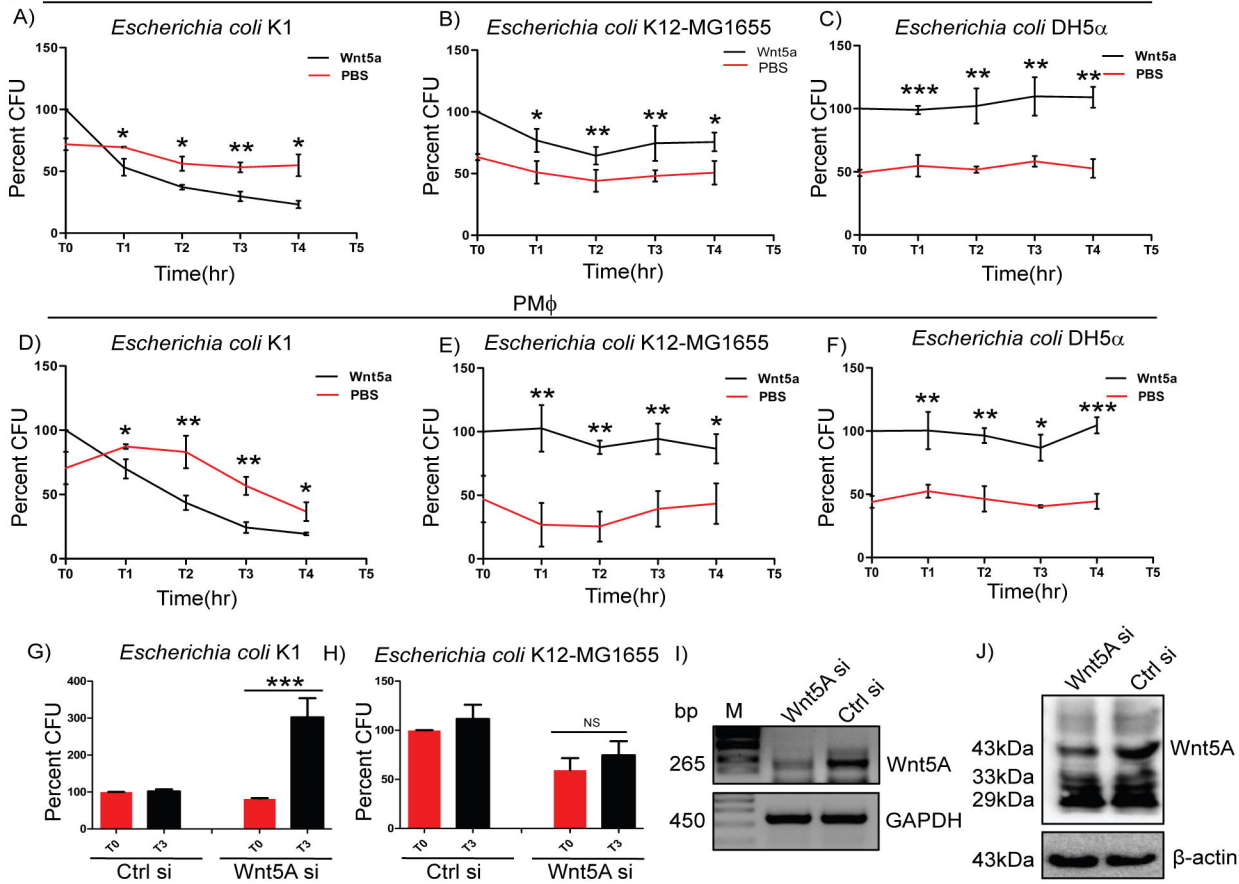

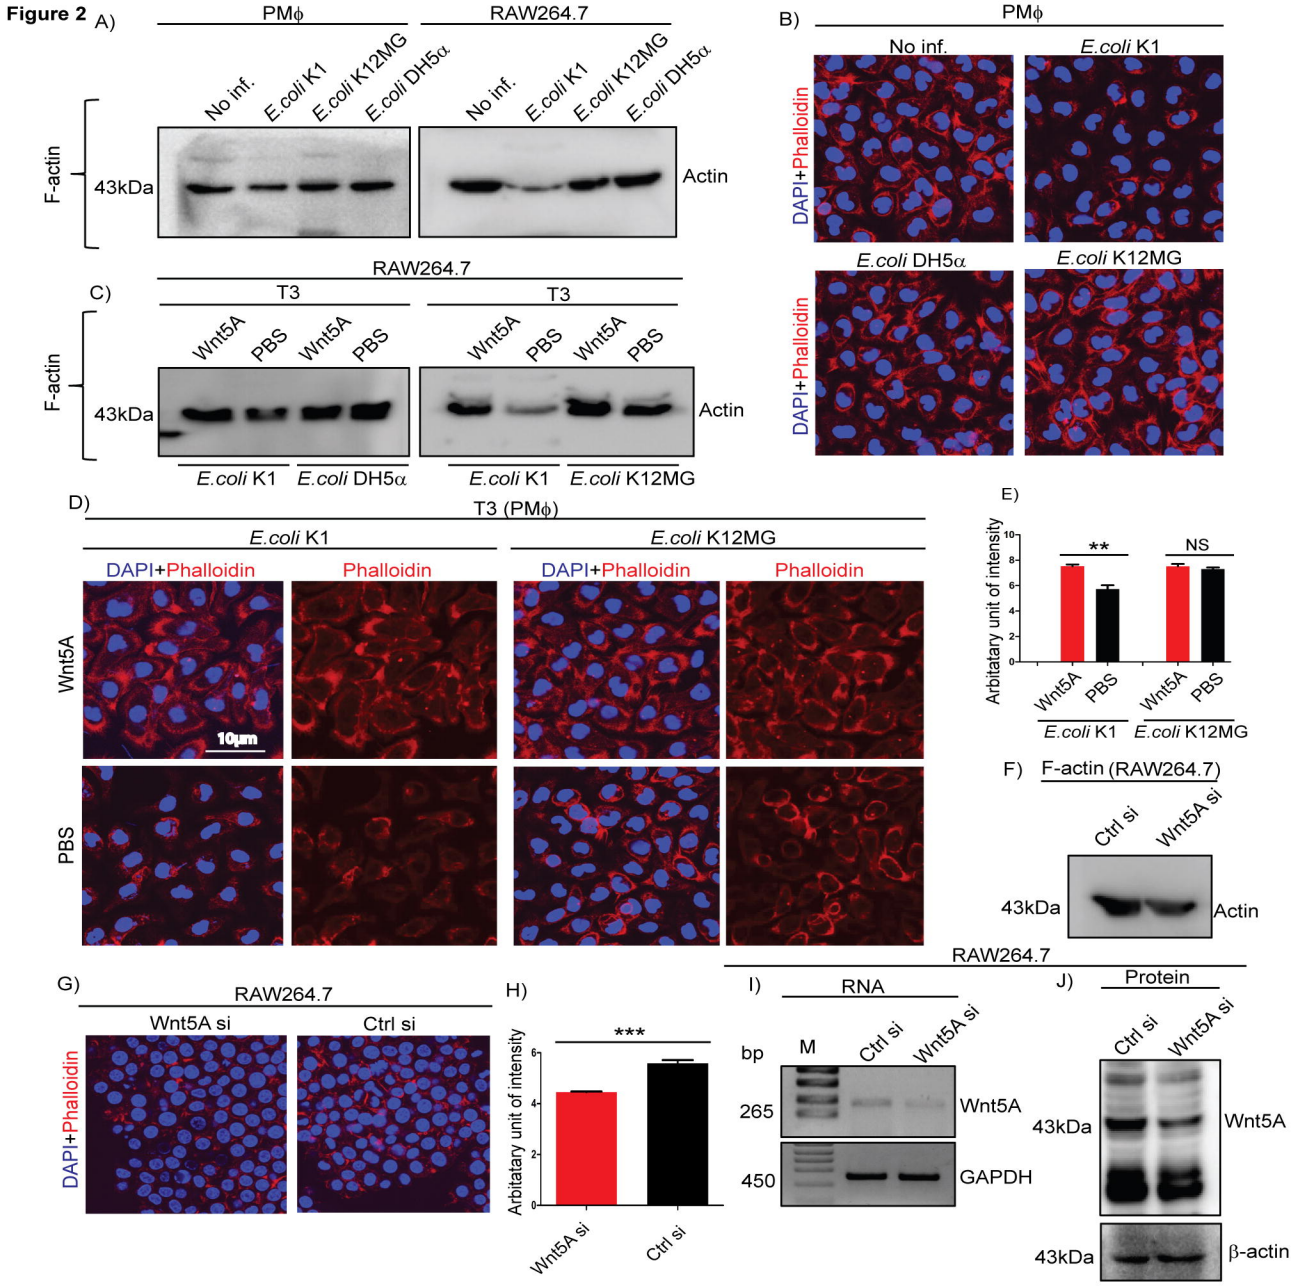

**Figure 3**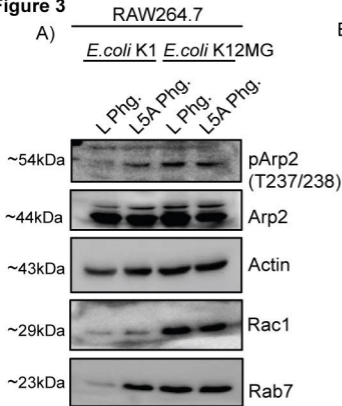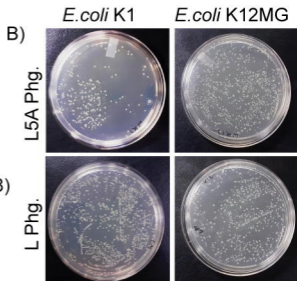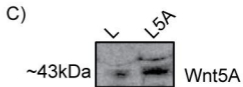

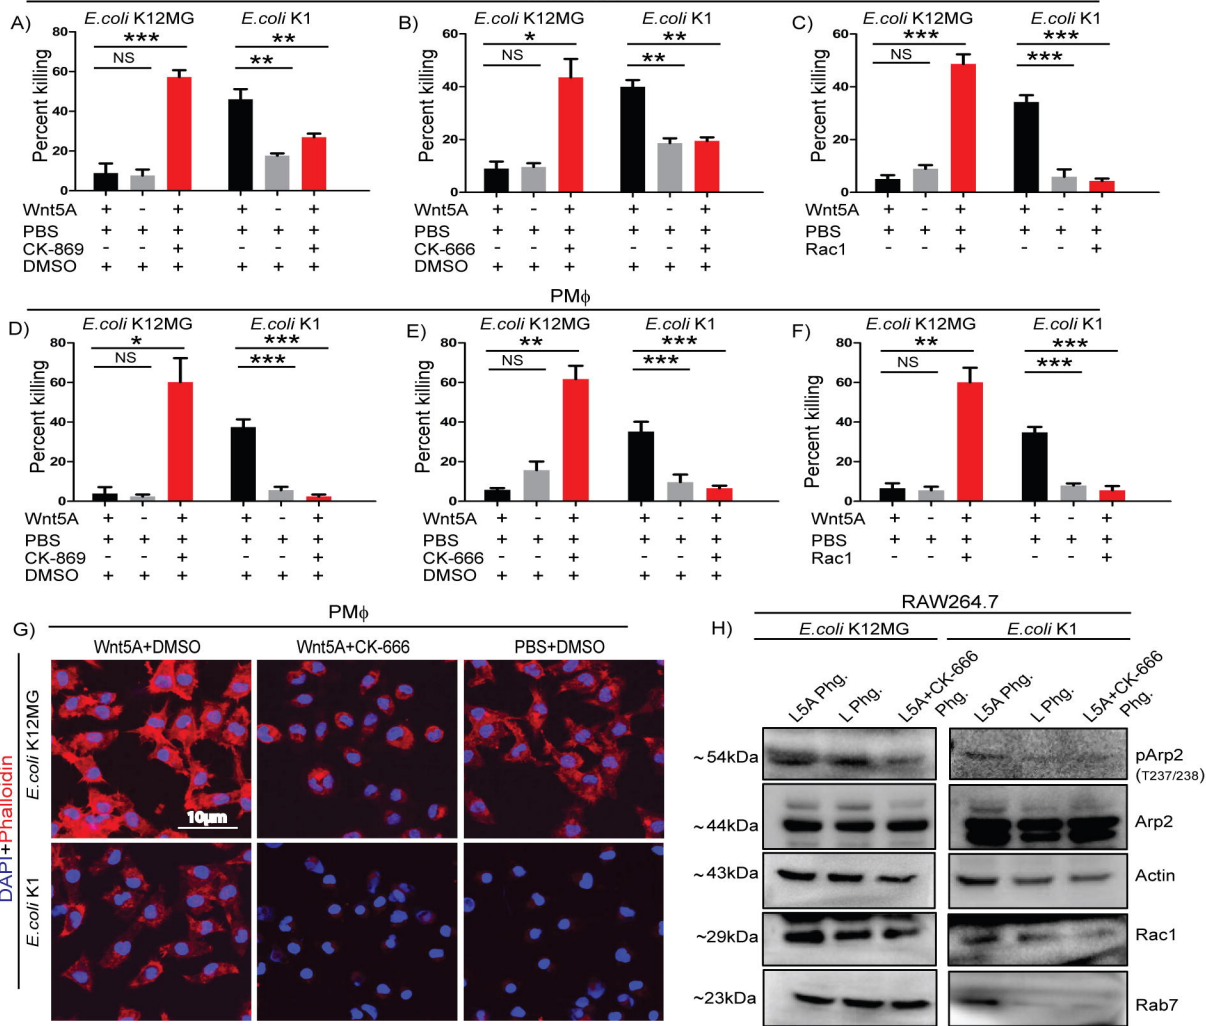

Source: https://www.biorxiv.org/content/10.1101/2020.05.04.075077v1.full.pdf
